# Supplementary material for: Determinants of cancer screening awareness and participation among Indonesian women
Source: Springer Nature journal article supplement (doi:10.1186/s12885-018-4125-z), 2018-02-20
Supplement: MOESM1 [file 12885_2018_4125_MOESM1_ESM.pdf]

**Table S1.** Demographic characteristics of women based on response to questions on cancer screening

|                                                               | All women aged $\geq 40$ (N=7,030) | Responded to questions on cancer screening |               |
|---------------------------------------------------------------|------------------------------------|--------------------------------------------|---------------|
|                                                               |                                    | Yes (N=6,320)                              | No (N=675)    |
| <b>Age</b> (years) – mean (SD)                                | 54.50 (11.43)                      | 52.88 (9.95)                               | 69.89 (12.97) |
| <b>Ethnicity, Javanese</b> – N (%) <sup>1</sup>               | 2893 (41.36)                       | 2863 (45.30)                               | 30 (4.44)     |
| <b>Urban residence</b> – N (%)                                | 4045 (57.54)                       | 3684 (58.29)                               | 361 (50.85)   |
| <b>Married</b> – N (%)                                        | 4828 (68.68)                       | 4594 (72.69)                               | 234 (32.96)   |
| <b>Education</b> – N (%) <sup>2</sup>                         |                                    |                                            |               |
| Less than high school                                         | 4512 (65.06)                       | 3592 (62.66)                               | 570 (86.51)   |
| High school                                                   | 1923 (27.67)                       | 1864 (29.55)                               | 59 (9.16)     |
| Higher education                                              | 506 (7.28)                         | 491 (7.79)                                 | 15 (2.33)     |
| <b>Monthly household expenditure</b> (million Rp) – mean (SD) | 1.03 (0.79)                        | 1.04 (0.78)                                | 0.90 (0.77)   |

<sup>1</sup>Excluding 10 missing values in the group who did not respond to questions on cancer screening

<sup>2</sup>Excluding 13 missing values in the group who responded and 66 in the group who did not respond to questions on cancer screening

## **Figure Legends**

**Figure S1.** Selection of study participants from IFLS5.

# IFLS5

13,535 household, 7,030  
women aged  $\geq 40$  years

Responding to cancer screening  
questions  
(N=6,320)

## Missing data:

- Household expenditure (N=627)
- Education (N=13)
- Travel time to nearest health services (N=39)
- BMI (N=69)
- Blood pressure (N=41)
- Age at menarche (N=6)

## Excluded:

- Diagnosed with cancer (N=65)

## Final study population

(N=5,397)
